# Supplementary material for: Biliatresone: progress in biliary atresia study
Source: PubMed Central journal article supplement (PMC10149470; doi:10.1007/s12519-022-00619-0), 2022-09-27
Supplement: 12519_2022_619_MOESM1_ESM.pdf [file 12519_2022_619_MOESM1_ESM.pdf]

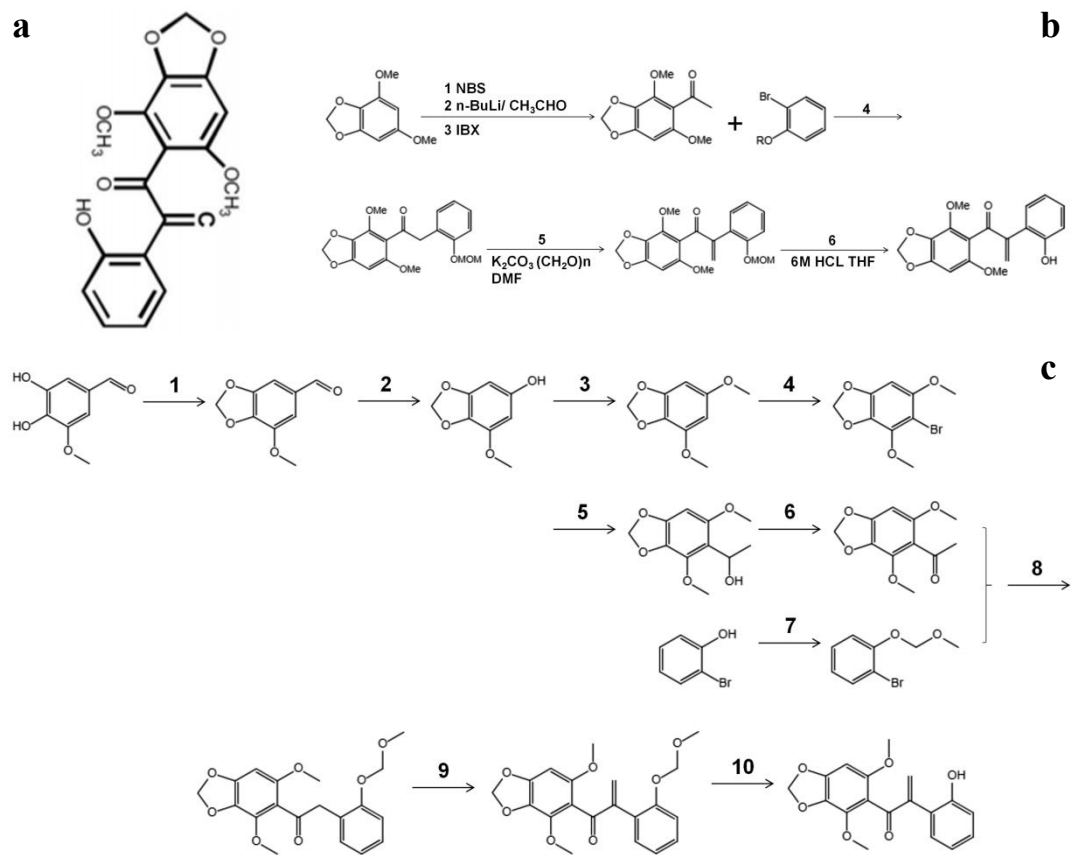

**Supplementary Fig. 1** Structural formula and in vitro synthetic route of biliatresone. **a** Structural formula of biliatresone; **b** in vitro synthetic route of biliatresone (Yang et al. [26]); **c** in vitro synthetic route of biliatresone (Estrada et al. [25])
